# Supplementary material for: A Low FODMAP Diet Is Nutritionally Adequate and Therapeutically Efficacious in Community Dwelling Older Adults with Chronic Diarrhoea
Source: PubMed Central journal article supplement (PMC7600506; doi:10.3390/nu12103002), 2020-09-30
Supplement: nutrients-12-03002-s001.pdf [file nutrients-12-03002-s001.pdf]

## Supplementary material

**Supplementary Table 1. Changes of participant scores from baseline scores to follow up scores for each SAGIS domain and question with percentage of participants that experienced worsening of symptom's, no change of symptoms and an improvement of symptoms.**

| SAGIS subdomains and individual questions                                 | Pre scores<br>No problem<br>/Mild<br>problem | Post scores<br>No<br>problem<br>/Mild<br>problem | Pre scores<br>Moderate<br>to very<br>severe<br>problem | Post scores<br>Moderate<br>to very<br>severe<br>problem | Worsened | No<br>change | Improved |
|---------------------------------------------------------------------------|----------------------------------------------|--------------------------------------------------|--------------------------------------------------------|---------------------------------------------------------|----------|--------------|----------|
| Acid<br>Regurgitation/Gas<br>(Q1,2,22)                                    |                                              |                                                  |                                                        |                                                         | 3(15%)   | 6(30%)       | 11(55%)  |
| Q1 Belching /heart<br>burn                                                | 14                                           | 19                                               | 6                                                      | 1                                                       | 3(15%)   | 9(45%)       | 8(40%)   |
| Q2 Dysphagia                                                              | 19                                           | 20                                               | 1                                                      | 0                                                       | 1(5%)    | 16(80%)      | 3(15%)   |
| Q22 Excessive<br>belching                                                 | 17                                           | 19                                               | 3                                                      | 1                                                       | 0(0%)    | 14(70%)      | 6(30%)   |
| Diarrhoea/incontinence<br>(Q 8,11,12,13,14,21)                            |                                              |                                                  |                                                        |                                                         | 1(5%)    | 1(5%)        | 18(90%)  |
| Q8 Pain or discomfort<br>prior to a bowel<br>motion                       | 10                                           | 17                                               | 10                                                     | 3                                                       | 1(5%)    | 12(60%)      | 7(35%)   |
| Q11 Loose stools                                                          | 6                                            | 17                                               | 14                                                     | 3                                                       | 0(0%)    | 6(30%)       | 14(70%)  |
| Q12 Incontinence                                                          | 18                                           | 20                                               | 2                                                      | 0                                                       | 0(0%)    | 14(70%)      | 6(30%)   |
| Q13 Urgency to<br>empty bowel                                             | 3                                            | 13                                               | 17                                                     | 7                                                       | 2(10%)   | 5(25%)       | 13(65%)  |
| Q14 Diarrhoea                                                             | 10                                           | 17                                               | 10                                                     | 3                                                       | 1(5%)    | 6(30%)       | 13(65%)  |
| Q21 Excessive gas<br>and passing of wind                                  | 7                                            | 15                                               | 13                                                     | 5                                                       | 0(0%)    | 9(45%)       | 11(55%)  |
| Constipation (Q9&10)                                                      |                                              |                                                  |                                                        |                                                         | 2(10%)   | 10(50%)      | 8(40%)   |
| Q9 Difficulty with<br>emptying the bowel                                  | 13                                           | 16                                               | 7                                                      | 4                                                       | 2(10%)   | 9(45%)       | 9(45%)   |
| Q10 Constipation                                                          | 17                                           | 18                                               | 3                                                      | 2                                                       | 4(20%)   | 9(45%)       | 7(35%)   |
| Nausea/vomiting<br>(Q15,17,18,19)                                         |                                              |                                                  |                                                        |                                                         | 1(5%)    | 16(80%)      | 3(15%)   |
| Q15 Loss of appetite                                                      | 17                                           | 19                                               | 3                                                      | 1                                                       | 3(15%)   | 13(65%)      | 4(20%)   |
| Q17 Sickness                                                              | 20                                           | 20                                               | 0                                                      | 0                                                       | 0(0%)    | 19(95%)      | 1(5%)    |
| Q18 Nausea                                                                | 20                                           | 20                                               | 0                                                      | 0                                                       | 0(0%)    | 18(90%)      | 2(10%)   |
| Q19 Vomiting                                                              | 20                                           | 20                                               | 0                                                      | 0                                                       | 0(0%)    | 19(95%)      | 1(5%)    |
| Epigastric<br>pain/discomfort<br>(3,4,5,6,7,16,20)                        |                                              |                                                  |                                                        |                                                         | 1(5%)    | 7(35%)       | 12(60%)  |
| Abbreviations: SAGIS = Structured Assessment of Gastrointestinal Symptoms |                                              |                                                  |                                                        |                                                         |          |              |          |

**Supplementary Table 2. Participants' acceptance of information provided**

|  | No | Yes | Comments |
|--|----|-----|----------|
|--|----|-----|----------|

|                                                                                                                                 |           |             |                                                                                                                                                                                                                                                                                                                                                                                                                              |
|---------------------------------------------------------------------------------------------------------------------------------|-----------|-------------|------------------------------------------------------------------------------------------------------------------------------------------------------------------------------------------------------------------------------------------------------------------------------------------------------------------------------------------------------------------------------------------------------------------------------|
| Was the diet taught in a way that you could easily understand it? (N=19)                                                        |           | 100% (n=19) | <ul style="list-style-type: none"> <li>▪ <i>It took some work and reading to get things on track</i></li> <li>▪ <i>The explanations made the following read through easier</i></li> </ul>                                                                                                                                                                                                                                    |
| Do you think you would have been able to follow the diet if only written information was given with no oral explanation? (n=16) | 57% (N=9) | 43% (N=7)   | <ul style="list-style-type: none"> <li>▪ <i>I was glad to have the oral explanation because my concentration span lessens with my age.</i></li> <li>▪ <i>Yes I could have followed it but was better to have contact with a dietitian.</i></li> <li>▪ <i>I think it would have been quite daunting without an oral explanation.</i></li> <li>▪ <i>The oral explanation helped with motivation to do the diet.</i></li> </ul> |

**Supplementary Table 3. Participants' perception of following the low FODMAP diet**

|                                                                         |                                                                            |                                                                                               |                                                                                                                                                                                                                                                  |   |
|-------------------------------------------------------------------------|----------------------------------------------------------------------------|-----------------------------------------------------------------------------------------------|--------------------------------------------------------------------------------------------------------------------------------------------------------------------------------------------------------------------------------------------------|---|
| Do you think you spent more or less than your usual shopping<br>N = 13  | No                                                                         | Yes                                                                                           | Extra spent per week                                                                                                                                                                                                                             | N |
|                                                                         | 54%<br>N=7                                                                 | 46%<br>N=6                                                                                    | Participant indicated spending more but no dollar amount given                                                                                                                                                                                   | 2 |
|                                                                         |                                                                            |                                                                                               | \$10-\$15                                                                                                                                                                                                                                        | 2 |
|                                                                         |                                                                            |                                                                                               | > \$20 a week                                                                                                                                                                                                                                    | 2 |
| Do you think you spent more or less time than you usual shopping<br>N=5 | More time                                                                  | Comments                                                                                      |                                                                                                                                                                                                                                                  |   |
|                                                                         | N=5                                                                        | I spent more time trying to find the right food I could eat and finding if it was safe to eat |                                                                                                                                                                                                                                                  |   |
| Were there any other resources that would have been helpful<br>N= 19    | No                                                                         | Yes                                                                                           | Comments                                                                                                                                                                                                                                         |   |
|                                                                         | 79%<br>N =15                                                               | 21%<br>N = 4                                                                                  | <ul style="list-style-type: none"> <li>▪ <i>FODMAP magazine - Australian. Added authenticity /proof that what I was experiencing was not uncommon.</i></li> <li>▪ <i>Knowing where to find low FODMAP products in the supermarket</i></li> </ul> |   |
| What was the most difficult part of the diet to follow                  | Comment                                                                    |                                                                                               |                                                                                                                                                                                                                                                  | N |
|                                                                         | <i>Missing high FODMAP foods</i>                                           |                                                                                               |                                                                                                                                                                                                                                                  | 5 |
|                                                                         | <i>Getting used to the change in diet/getting started</i>                  |                                                                                               |                                                                                                                                                                                                                                                  | 4 |
|                                                                         | <i>Eating the gluten free bread – expensive and/or taste</i>               |                                                                                               |                                                                                                                                                                                                                                                  | 3 |
|                                                                         | <i>Entertaining or eating out</i>                                          |                                                                                               |                                                                                                                                                                                                                                                  | 2 |
|                                                                         | <i>Reading food labels</i>                                                 |                                                                                               |                                                                                                                                                                                                                                                  | 1 |
|                                                                         | <i>Often there wasn't any food I could eat so was hungry several times</i> |                                                                                               |                                                                                                                                                                                                                                                  | 1 |

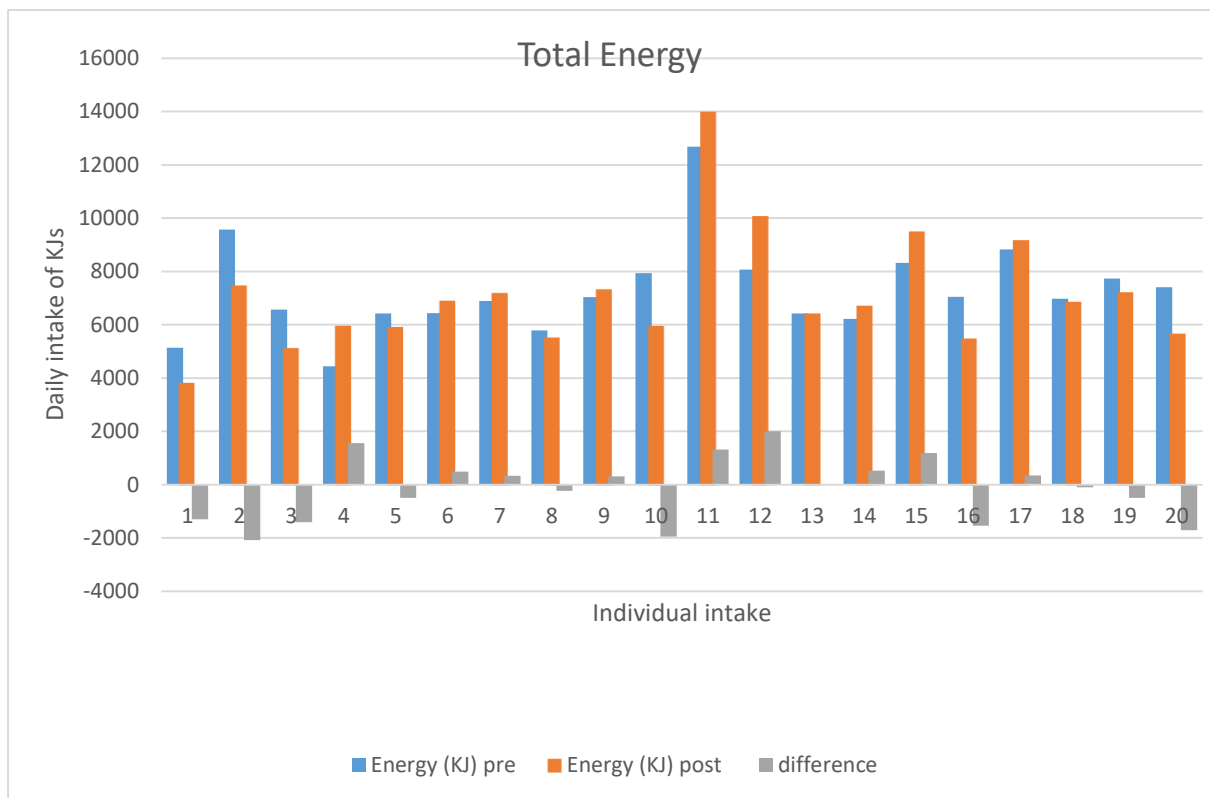

**Supplementary Figure 1. Individual total energy (KJ) differences at baseline and follow up. Data represents the energy intake of each individual at baseline, follow up and the difference between intakes.**

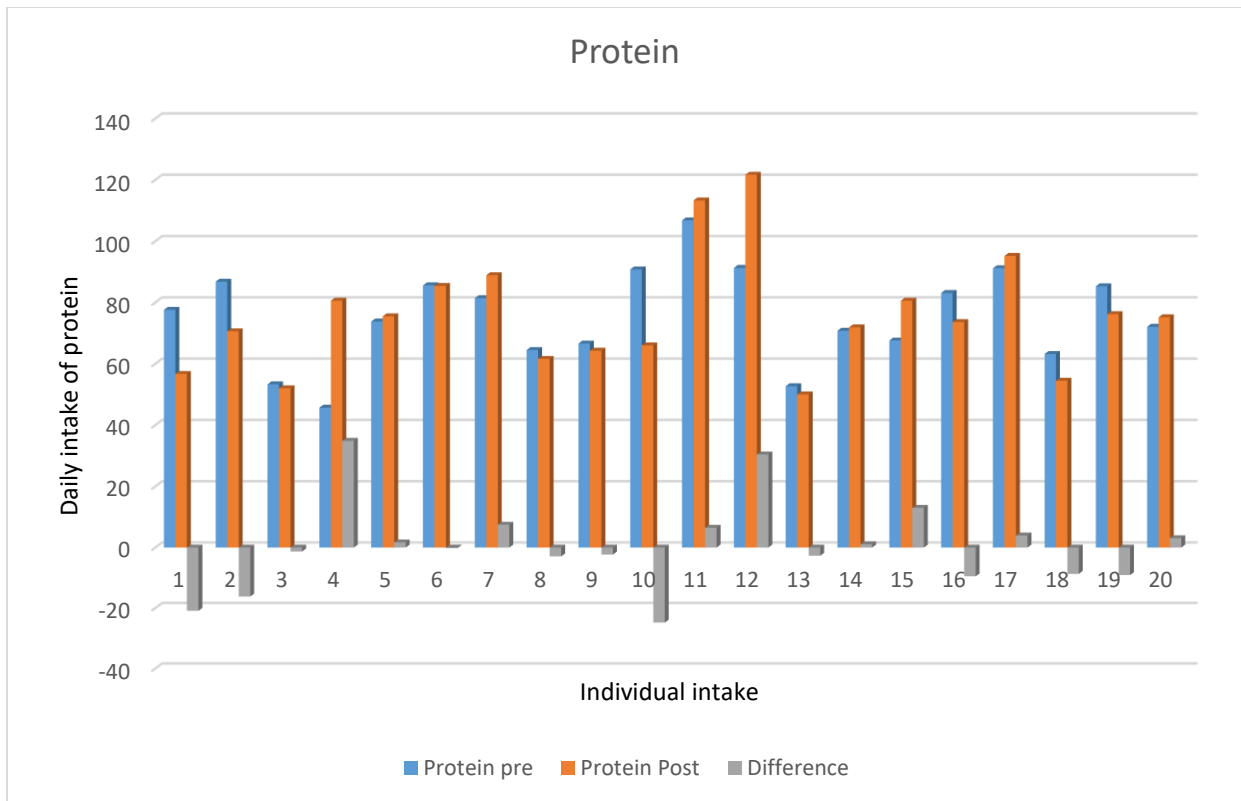

**Supplementary Figure 2. Individual protein intake at baseline and follow up. Data represents the protein intake of each individual at baseline, follow up and the difference between intakes.**

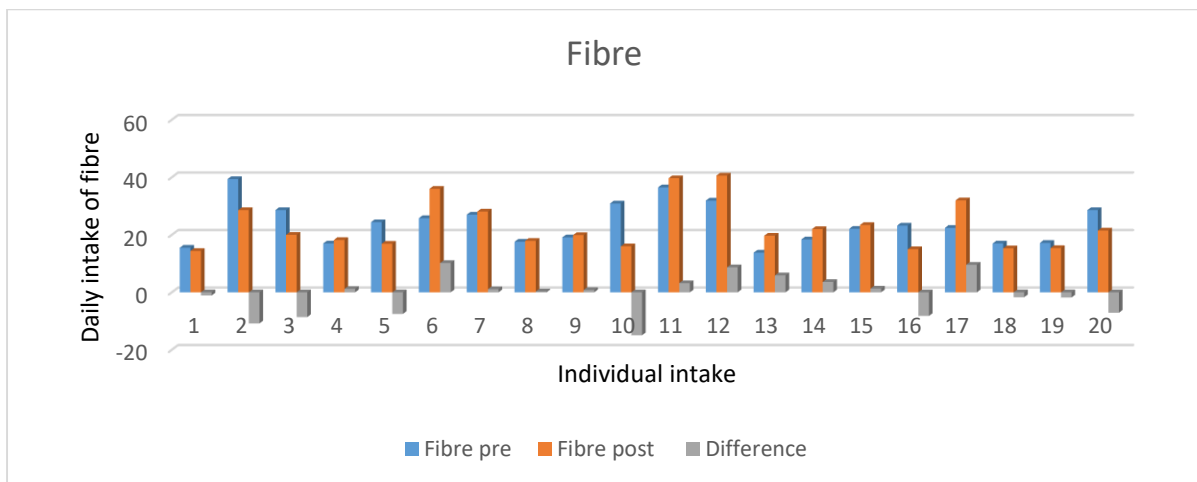

**Supplementary Figure 3. Individual fibre intake at baseline and follow up. Data represents the fibre intake of each individual at baseline, follow up and the difference between intakes.**
